# Supplementary material for: An Investigation into the Adoption Behavior of mHealth Users: From the Perspective of the Push-Pull-Mooring Framework
Source: MDPI journal article supplement (doi:10.3390/su142114372), 2022-11-02
Supplement: s1 [file s1]

Archive with 1 entries (1 files):
- sustainability-1962231-supplementary.pdf
